# Supplementary material for: Antioxidative, Antifungal and Additive Activity of the Antimicrobial Peptides Leg1 and Leg2 from Chickpea
Source: PubMed Central journal article supplement (PMC7998185; doi:10.3390/foods10030585), 2021-03-11
Supplement: foods-10-00585-s001.pdf [file foods-10-00585-s001.pdf]

# Antioxidative, Antifungal and Additive Activity of the Antimicrobial Peptides Leg1 and Leg2 from Chickpea

Marie-Louise Heymich <sup>1</sup>, Laura Nißl <sup>2</sup>, Dominik Hahn <sup>1</sup>, Matthias Noll <sup>2</sup> and Monika Pischetsrieder <sup>1,\*</sup>

<sup>1</sup> Food Chemistry, Department of Chemistry and Pharmacy, Friedrich-Alexander Universität Erlangen-Nürnberg (FAU), Nikolaus-Fiebiger-Str. 10, 91058 Erlangen, Germany; marie-louise.heylich@fau.de; dominik.hahn@fau.de; monika.pischetsrieder@fau.de

<sup>2</sup> Institute for Bioanalysis, Department of Applied Sciences, Coburg University of Applied Sciences and Arts, Friedrich-Streib-Str. 2, 96450 Coburg, Germany; lauranissl@web.de; matthias.noll@hs-coburg.de

\* Correspondence: monika.pischetsrieder@fau.de;

**Table S1.** Antifungal susceptibility tests of Leg1, Leg2 and nisin against *A. niger* using a microdilution assay. Fungal growth was monitored at  $\Delta OD_{620nm}$  and compared to negative control ( $OD_{620nm} = 2.4$ ;  $n = 3$ ). For comparison, sodium benzoate was tested accordingly ( $n = 3$ ).

| Concentration [ $\mu M$ ] | OD <sub>620nm</sub> values |        |        |        |        |      |      |      |     |       |       |
|---------------------------|----------------------------|--------|--------|--------|--------|------|------|------|-----|-------|-------|
|                           | 1000                       | 500    | 250    | 125    | 62.5   | 31.3 | 15.6 | 7.8  | 3.9 | 2.0   | 1.0   |
| Leg1                      | 2.4                        | 2.3    | 2.2    | 2.3    | 2.3    | 2.2  | 2.3  | 2.2  | 2.3 | 2.2   | 2.1   |
| Leg2                      | 2.3                        | 2.4    | 2.3    | 2.0    | 2.2    | 2.3  | 2.2  | 2.2  | 2.1 | 2.2   | 2.2   |
| Nisin                     | 3.5                        | 3.4    | 3.5    | 3.1    | 2.9    | 2.4  | 2.4  | 2.9  | 2.4 | 2.6   | 2.5   |
| Concentration [ $\mu M$ ] | 160,000                    | 80,000 | 40,000 | 20,000 | 10,000 | 5000 | 2500 | 1250 | 625 | 312.5 | 156.3 |
| Sodium benzoate           | 0.1                        | 0.1    | 0.1    | 0.1    | 1.8    | 3.1  | 2.9  | 2.3  | 2.2 | 2.5   | 2.5   |

**Table S2.** Antifungal susceptibility tests of Leg1, Leg2 and nisin against *P. membranifaciens* using a microdilution assay. Fungal growth was monitored at  $\Delta OD_{620nm}$  and compared to negative control ( $OD_{620nm} = 2.1$ ;  $n = 3$ ). For comparison, sodium benzoate was tested accordingly ( $n = 3$ ).

| Concentration [ $\mu M$ ] | OD <sub>620nm</sub> values |        |        |        |        |      |      |      |     |       |       |
|---------------------------|----------------------------|--------|--------|--------|--------|------|------|------|-----|-------|-------|
|                           | 1000                       | 500    | 250    | 125    | 62.5   | 31.3 | 15.6 | 7.8  | 3.9 | 2.0   | 1.0   |
| Leg1                      | 1.5                        | 1.5    | 1.2    | 2.0    | 1.7    | 1.8  | 1.5  | 2.1  | 2.2 | 2.0   | 2.1   |
| Leg2                      | 1.4                        | 1.8    | 1.7    | 1.9    | 2.1    | 2.2  | 1.7  | 1.5  | 1.9 | 1.6   | 1.9   |
| Nisin                     | 1.6                        | 1.5    | 1.3    | 1.8    | 2.1    | 2.1  | 2.0  | 1.9  | 2.2 | 2.2   | 2.1   |
| Concentration [ $\mu M$ ] | 160,000                    | 80,000 | 40,000 | 20,000 | 10,000 | 5000 | 2500 | 1250 | 625 | 312.5 | 156.3 |
| Sodium benzoate           | 0.1                        | 0.3    | 0.4    | 0.8    | 1.1    | 1.8  | 2.0  | 2.0  | 2.1 | 2.1   | 2.1   |

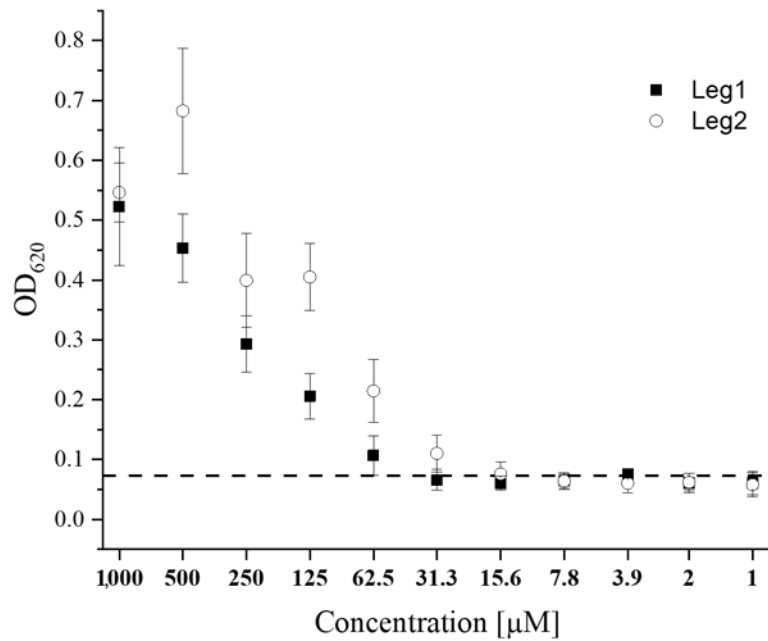

**Figure S1.** Optical density ( $\text{OD}_{620}$ ) values of the blank controls consisting of water, yeast/molds (YM) agar and different concentrations of Leg1 or Leg2 (1–1 000  $\mu\text{M}$ ). The means  $\pm$ SD of triplicates are displayed. Water instead of the antimicrobial peptides was used as negative control (dashed line). The figure shows significant differences compared to the negative control.
